# Supplementary material for: Longitudinal Analysis of the Intestinal Microbiota in the Obese Mangalica Pig Reveals Alterations in Bacteria and Bacteriophage Populations Associated With Changes in Body Composition and Diet
Source: Front Cell Infect Microbiol. 2021 Oct 19;11:698657. doi: 10.3389/fcimb.2021.698657 (PMC8560744; doi:10.3389/fcimb.2021.698657)
Supplement: Supplementary file 8 [file Table_3.xlsx]

## Sheet: Sheet1
Table S3. Differential Abundance Time Series - Bacterial Phylum
	Initial												1 Week PD												10 Week PD												14 Week PD												18 Week PD
Phylum	Log2 Fold Change LF-AL	Log2 Fold Change LF-HF	Log2 Fold Change AL-HF	Standard Error LF-AL	Standard Error LF-HF	Standard Error AL-HF	p-value LF-AL	p-value LF-HF	p-value AL-HF	padj LF-AL	padj LF-HF	padj AL-HF	Log2 Fold Change LF-AL	Log2 Fold Change LF-HF	Log2 Fold Change AL-HF	Standard Error LF-AL	Standard Error LF-HF	Standard Error AL-HF	p-value LF-AL	p-value LF-HF	p-value AL-HF	padj LF-AL	padj LF-HF	padj AL-HF	Log2 Fold Change LF-AL	Log2 Fold Change LF-HF	Log2 Fold Change AL-HF	Standard Error LF-AL	Standard Error LF-HF	Standard Error AL-HF	p-value LF-AL	p-value LF-HF	p-value AL-HF	padj LF-AL	padj LF-HF	padj AL-HF	Log2 Fold Change LF-AL	Log2 Fold Change LF-HF	Log2 Fold Change AL-HF	Standard Error LF-AL	Standard Error LF-HF	Standard Error AL-HF	p-value LF-AL	p-value LF-HF	p-value AL-HF	padj LF-AL	padj LF-HF	padj AL-HF	Log2 Fold Change LF-AL
p__Actinobacteria	-0.803824	0.937614	1.74144	1.74737	1.74757	1.74741	0.645503	0.591597	0.318968	0.645503	0.715181	0.478452	1.44261	0.119228	-1.32338	1.40203	1.40194	1.40206	0.303506	0.932225	0.345228	0.48561	0.94003	0.555593	1.04352	12.9715	11.928	1.41033	2.01723	2.01739	0.459352	1.27304e-10	3.36754e-09	0.803866	8.91128e-10	2.35728e-08	-0.128727	3.69367	3.82239	2.59196	2.59264	2.59258	0.96039	0.154251	0.140385	0.962657	0.265433	0.421154	1.11354
p__Bacteroidetes	1.01982	0.573828	-0.44599	0.198648	0.198646	0.198648	2.83975e-07	0.0038684	0.0247598	1.7e-06	0.0232104	0.147102	-0.510661	-0.228851	0.28181	0.35189	0.351893	0.351889	0.146725	0.515471	0.423219	0.350236	0.94003	0.564292	1.30202	1.80969	0.507667	0.497574	0.49758	0.497585	0.0088774	0.000275853	0.307604	0.0310709	0.000965487	0.358872	-0.0979631	0.320586	0.418549	0.20629	0.206319	0.206292	0.634872	0.120224	0.0424669	0.956743	0.265433	0.254801	0.184704
p__Candidatus_Melainabacteria	NA	NA	NA	NA	NA	NA	NA	NA	NA	NA	NA	NA	-7.50445	-9.47287	-1.96842	4.7871	4.78575	4.56553	0.116966	0.0477721	0.66636	0.350236	0.191088	0.761554	-23.984	0	23.5726	4.78517	4.99758	4.78517	5.38264e-07	1	8.38564e-07	3.76785e-06	1	2.93497e-06	NA	NA	NA	NA	NA	NA	NA	NA	NA	NA	NA	NA	NA
p__Chlamydiae	-3.18097	-4.24328	-1.06231	1.66983	1.6698	1.66861	0.056785	0.0110475	0.524357	0.11357	0.0331425	0.629229	1.1821	25.9946	24.8125	3.33883	3.63703	3.63706	0.723305	8.85551e-13	8.96964e-12	0.826634	7.08441e-12	7.17571e-11	NA	NA	NA	NA	NA	NA	NA	NA	NA	NA	NA	NA	NA	NA	NA	NA	NA	NA	NA	NA	NA	NA	NA	NA	NA
p__Fibrobacteres	NA	NA	NA	NA	NA	NA	NA	NA	NA	NA	NA	NA	22.7072	1.96112	-20.7461	4.78531	4.56553	4.78731	2.08305e-06	0.667523	1.46719e-05	1.66644e-05	0.94003	5.86878e-05	1.14537	-1.8288	-2.97417	4.30401	4.30107	4.30308	0.79015	0.670693	0.489457	0.849376	0.782475	0.489457	2.1481	-0.474771	-2.62287	4.56327	4.56286	4.56309	0.637829	0.917129	0.565426	0.956743	0.917129	0.759447	-23.0875
p__Firmicutes	0.17403	0.14712	-0.0269101	0.277488	0.277488	0.277483	0.530552	0.595984	0.922743	0.636663	0.715181	0.922743	0.556878	0.167117	-0.389762	0.410695	0.410696	0.410696	0.175118	0.684073	0.342607	0.350236	0.94003	0.555593	0.0835184	0.814449	0.73093	0.439768	0.439777	0.439778	0.849376	0.064032	0.0965043	0.849376	0.0896449	0.135106	0.439195	0.369532	-0.0696624	0.141982	0.141997	0.141984	0.00197938	0.00925731	0.623685	0.0118763	0.0555438	0.759447	0.454118
p__Proteobacteria	-1.19051	0.153632	1.34414	0.682921	0.682953	0.682897	0.0812874	0.822016	0.0490338	0.121931	0.822016	0.147102	-0.552065	0.0480332	0.600098	0.638433	0.63846	0.638439	0.387193	0.94003	0.347245	0.516258	0.94003	0.555593	-0.825095	-1.78654	-0.961442	0.536294	0.536251	0.536176	0.123923	0.000863704	0.0729493	0.289154	0.00201531	0.127661	0.0431425	-0.36707	-0.410212	0.921468	0.921482	0.921448	0.962657	0.690374	0.656188	0.962657	0.828449	0.759447	-0.0878317
p__Spirochaetes	1.01306	0.491464	-0.521595	0.461612	0.461604	0.461608	0.0281913	0.287017	0.258497	0.084574	0.574034	0.478452	-0.0264155	0.0722735	0.098689	0.328439	0.328445	0.328441	0.935897	0.825834	0.763814	0.935897	0.94003	0.763814	-0.176865	-1.22385	-1.04699	0.49483	0.494826	0.494826	0.720774	0.0133872	0.0343556	0.849376	0.0234277	0.0801632	-0.602319	-0.490975	0.111343	0.363628	0.363635	0.36362	0.097638	0.176955	0.759447	0.292914	0.265433	0.759447	-0.380177
[truncated: 11 more columns]
