# Supplementary material for: Longitudinal Analysis of the Intestinal Microbiota in the Obese Mangalica Pig Reveals Alterations in Bacteria and Bacteriophage Populations Associated With Changes in Body Composition and Diet
Source: Front Cell Infect Microbiol. 2021 Oct 19;11:698657. doi: 10.3389/fcimb.2021.698657 (PMC8560744; doi:10.3389/fcimb.2021.698657)
Supplement: Supplementary file 11 [file Table_6.xlsx]

## Sheet: Sheet1
Table S6 Differential Abundance Time Series - Viral Species
	Initial												1 Week PD												10 Week PD												14 Week PD												18 Week PD
Species	Log2 Fold Change LF-AL	Log2 Fold Change LF-HF	Log2 Fold Change AL-HF	Standard Error LF-AL	Standard Error LF-HF	Standard Error AL-HF	p value LF-AL	p value LF-HF	p value AL-HF	padj LF-AL	padj LF-HF	padj AL-HF	Log2 Fold Change LF-AL	Log2 Fold Change LF-HF	Log2 Fold Change AL-HF	Standard Error LF-AL	Standard Error LF-HF	Standard Error AL-HF	p value LF-AL	p value LF-HF	p value AL-HF	padj LF-AL	padj LF-HF	padj AL-HF	Log2 Fold Change LF-AL	Log2 Fold Change LF-HF	Log2 Fold Change AL-HF	Standard Error LF-AL	Standard Error LF-HF	Standard Error AL-HF	p value LF-AL	p value LF-HF	p value AL-HF	padj LF-AL	padj LF-HF	padj AL-HF	Log2 Fold Change LF-AL	Log2 Fold Change LF-HF	Log2 Fold Change AL-HF	Standard Error LF-AL	Standard Error LF-HF	Standard Error AL-HF	p value LF-AL	p value LF-HF	p value AL-HF	padj LF-AL	padj LF-HF	padj AL-HF	Log2 Fold Change LF-AL
s__Adoxophyes_orana_granulovirus	0	-6.48974	-7.09121	6.12056	5.95341	4.7911	1	0.275674	0.138852	1	0.801961	0.599835	NA	NA	NA	NA	NA	NA	NA	NA	NA	NA	NA	NA	NA	NA	NA	NA	NA	NA	NA	NA	NA	NA	NA	NA	-7.44146	0	6.94148	4.79037	4.99758	4.79037	0.120323	1	0.147324	0.671804	1	0.486883	NA
s__Bacillus_phage_phBC6A51	NA	NA	NA	NA	NA	NA	NA	NA	NA	NA	NA	NA	NA	NA	NA	NA	NA	NA	NA	NA	NA	NA	NA	NA	NA	NA	NA	NA	NA	NA	NA	NA	NA	NA	NA	NA	-0.605334	-0.119117	0.486216	3.78227	3.78466	3.78528	0.872846	0.974892	0.897793	0.909214	1	1	5.90261
s__Bacillus_phage_phBC6A52	NA	NA	NA	NA	NA	NA	NA	NA	NA	NA	NA	NA	NA	NA	NA	NA	NA	NA	NA	NA	NA	NA	NA	NA	NA	NA	NA	NA	NA	NA	NA	NA	NA	NA	NA	NA	7.39032	-1.87059	-9.2609	4.22245	3.96949	4.221	0.0800763	0.637469	0.0282351	0.671804	1	0.235293	2.03102
s__Bacillus_virus_BMBtp2	NA	NA	NA	NA	NA	NA	NA	NA	NA	NA	NA	NA	NA	NA	NA	NA	NA	NA	NA	NA	NA	NA	NA	NA	NA	NA	NA	NA	NA	NA	NA	NA	NA	NA	NA	NA	NA	NA	NA	NA	NA	NA	NA	NA	NA	NA	NA	NA	-4.92822
s__Bacillus_virus_IEBH	-6.80158	0	6.87373	5.95097	6.12071	4.78824	0.253065	1	0.151132	0.826252	1	0.599835	NA	NA	NA	NA	NA	NA	NA	NA	NA	NA	NA	NA	-0.488615	-0.650384	-0.161769	0.970204	0.969337	0.969902	0.614528	0.502248	0.867536	1	0.678034	1	-0.838376	-0.626515	0.211861	2.84201	2.84205	2.84199	0.767998	0.825525	0.940576	0.85948	1	1	3.67058e-05
s__Brochothrix_phage_BL3	-5.72008	0	5.79221	5.95412	6.12071	4.79216	0.336707	1	0.226784	0.864201	1	0.686304	7.39867	2.92543	-4.47325	4.36902	4.14019	4.37758	0.0903715	0.47982	0.30685	0.469932	0.702721	0.699121	NA	NA	NA	NA	NA	NA	NA	NA	NA	NA	NA	NA	NA	NA	NA	NA	NA	NA	NA	NA	NA	NA	NA	NA	NA
s__Brochothrix_phage_NF5	1.51948	1.25857	-0.260914	2.64448	2.64549	2.16393	0.565572	0.63426	0.904029	0.866768	1	0.933191	1.09362	9.16859	8.07497	3.62545	3.89642	3.89772	0.762918	0.0186187	0.0382922	1	0.069155	0.199119	NA	NA	NA	NA	NA	NA	NA	NA	NA	NA	NA	NA	NA	NA	NA	NA	NA	NA	NA	NA	NA	NA	NA	NA	NA
s__Corynebacterium_phage_P1201	NA	NA	NA	NA	NA	NA	NA	NA	NA	NA	NA	NA	NA	NA	NA	NA	NA	NA	NA	NA	NA	NA	NA	NA	NA	NA	NA	NA	NA	NA	NA	NA	NA	NA	NA	NA	5.22193	5.4471	0	4.79436	4.79448	4.99746	0.276074	0.255907	1	0.790197	0.738381	1	NA
s__Cyprinid_herpesvirus_3	NA	NA	NA	NA	NA	NA	NA	NA	NA	NA	NA	NA	NA	NA	NA	NA	NA	NA	NA	NA	NA	NA	NA	NA	NA	NA	NA	NA	NA	NA	NA	NA	NA	NA	NA	NA	6.19969	6.42488	0	4.78961	4.78973	4.99746	0.195526	0.179795	1	0.698307	0.738381	1	NA
s__Enterobacteria_phage_cdtI	-11.0393	-10.6718	0.367571	3.13935	3.13961	1.94916	0.000437374	0.000676157	0.850423	0.013996	0.0108185	0.922464	NA	NA	NA	NA	NA	NA	NA	NA	NA	NA	NA	NA	NA	NA	NA	NA	NA	NA	NA	NA	NA	NA	NA	NA	NA	NA	NA	NA	NA	NA	NA	NA	NA	NA	NA	NA	NA
s__Enterobacteria_phage_fiAA91_ss	-7.89947	0	7.97161	5.18381	5.37943	4.15046	0.12754	1	0.0547751	0.64662	1	0.404587	NA	NA	NA	NA	NA	NA	NA	NA	NA	NA	NA	NA	NA	NA	NA	NA	NA	NA	NA	NA	NA	NA	NA	NA	NA	NA	NA	NA	NA	NA	NA	NA	NA	NA	NA	NA	NA
s__Enterobacteria_phage_IME10	NA	NA	NA	NA	NA	NA	NA	NA	NA	NA	NA	NA	NA	NA	NA	NA	NA	NA	NA	NA	NA	NA	NA	NA	0	-7.44336	-6.56357	4.99745	4.78992	4.7898	1	0.120193	0.170586	1	0.354765	0.357106	NA	NA	NA	NA	NA	NA	NA	NA	NA	NA	NA	NA	-6.39376
s__Enterobacteria_phage_mEp460	-3.57499	-2.87088	0.704115	2.41044	2.41124	1.95318	0.13804	0.233802	0.718476	0.64662	0.801961	0.872424	NA	NA	NA	NA	NA	NA	NA	NA	NA	NA	NA	NA	0	-5.32165	-4.44188	4.99745	4.80694	4.80682	1	0.268261	0.355445	1	0.510449	0.505107	NA	NA	NA	NA	NA	NA	NA	NA	NA	NA	NA	NA	0
s__Enterobacteria_phage_P4	NA	NA	NA	NA	NA	NA	NA	NA	NA	NA	NA	NA	NA	NA	NA	NA	NA	NA	NA	NA	NA	NA	NA	NA	0	-4.58781	-3.70805	4.99745	4.82154	4.82142	1	0.341338	0.441846	1	0.542125	0.568088	NA	NA	NA	NA	NA	NA	NA	NA	NA	NA	NA	NA	NA
s__Enterobacteria_phage_phiP27	-2.45121	-1.5796	0.871616	2.28802	2.28894	1.86288	0.284024	0.490132	0.639865	0.826252	1	0.872424	NA	NA	NA	NA	NA	NA	NA	NA	NA	NA	NA	NA	NA	NA	NA	NA	NA	NA	NA	NA	NA	NA	NA	NA	NA	NA	NA	NA	NA	NA	NA	NA	NA	NA	NA	NA	NA
s__Enterobacteria_phage_YYZ_2008	-1.72878	-0.470172	1.25861	2.99314	2.99444	2.44212	0.563546	0.875233	0.606291	0.866768	1	0.872424	NA	NA	NA	NA	NA	NA	NA	NA	NA	NA	NA	NA	NA	NA	NA	NA	NA	NA	NA	NA	NA	NA	NA	NA	NA	NA	NA	NA	NA	NA	NA	NA	NA	NA	NA	NA	NA
s__Escherichia_phage_D108	NA	NA	NA	NA	NA	NA	NA	NA	NA	NA	NA	NA	0	-4.05942	-4.71041	4.99745	4.79663	4.79651	1	0.397382	0.326076	1	0.702721	0.699121	0	-9.5822	-8.70245	3.29315	2.96223	2.9622	1	0.00121732	0.00330517	1	0.0164338	0.0297465	NA	NA	NA	NA	NA	NA	NA	NA	NA	NA	NA	NA	0
s__Escherichia_virus_HK544	-8.2551	-5.25453	3.00058	4.14056	4.15647	2.96692	0.0461828	0.206165	0.311852	0.492616	0.801961	0.70922	NA	NA	NA	NA	NA	NA	NA	NA	NA	NA	NA	NA	NA	NA	NA	NA	NA	NA	NA	NA	NA	NA	NA	NA	NA	NA	NA	NA	NA	NA	NA	NA	NA	NA	NA	NA	NA
s__Escherichia_virus_P1	NA	NA	NA	NA	NA	NA	NA	NA	NA	NA	NA	NA	NA	NA	NA	NA	NA	NA	NA	NA	NA	NA	NA	NA	0	-9.75015	-8.87032	4.99745	4.78585	4.78573	1	0.0416215	0.0638117	1	0.295364	0.287153	NA	NA	NA	NA	NA	NA	NA	NA	NA	NA	NA	NA	-8.67326
s__Escherichia_virus_P2	NA	NA	NA	NA	NA	NA	NA	NA	NA	NA	NA	NA	NA	NA	NA	NA	NA	NA	NA	NA	NA	NA	NA	NA	NA	NA	NA	NA	NA	NA	NA	NA	NA	NA	NA	NA	NA	NA	NA	NA	NA	NA	NA	NA	NA	NA	NA	NA	0
s__Escherichia_virus_phiV10	NA	NA	NA	NA	NA	NA	NA	NA	NA	NA	NA	NA	NA	NA	NA	NA	NA	NA	NA	NA	NA	NA	NA	NA	NA	NA	NA	NA	NA	NA	NA	NA	NA	NA	NA	NA	NA	NA	NA	NA	NA	NA	NA	NA	NA	NA	NA	NA	-6.17847
s__Human_mastadenovirus_D	NA	NA	NA	NA	NA	NA	NA	NA	NA	NA	NA	NA	NA	NA	NA	NA	NA	NA	NA	NA	NA	NA	NA	NA	NA	NA	NA	NA	NA	NA	NA	NA	NA	NA	NA	NA	-3.30792	0	2.80794	4.88284	4.99758	4.88284	0.498115	1	0.565248	0.85948	1	1	NA
s__Lactobacillus_phage_LL_H	NA	NA	NA	NA	NA	NA	NA	NA	NA	NA	NA	NA	5.9502	6.88873	0	4.80132	4.80144	4.99745	0.21524	0.151367	1	0.660769	0.357776	1	NA	NA	NA	NA	NA	NA	NA	NA	NA	NA	NA	NA	7.82174	8.04695	0	4.7863	4.78642	4.99746	0.102218	0.0927232	1	0.671804	0.738381	1	NA
s__Lactobacillus_phage_phiAQ113	-0.260689	0.948395	1.20908	2.16397	2.16439	1.76715	0.904113	0.661254	0.49385	1	1	0.831774	2.60966e-05	-1.29357e-13	-2.60966e-05	2.54186	2.54142	2.54087	0.999992	1	0.999992	1	1	1	0.49222	0.493618	0.00139772	0.87178	0.870703	0.87383	0.572336	0.57077	0.998724	1	0.70049	1	0.755711	0.381711	-0.374	2.84772	2.84697	2.84859	0.790722	0.893342	0.895544	0.85948	1	1	8.49401
s__Lactobacillus_prophage_Lj928	-0.397124	-0.430937	-0.0338135	2.29236	2.29287	1.87045	0.862464	0.850919	0.985577	1	1	0.985577	1.39534	2.67769	1.28235	3.65284	3.65318	3.65378	0.702469	0.463574	0.725615	1	0.702721	1	6.19913	-2.10385	-8.30298	4.78947	4.56876	4.78623	0.195554	0.645167	0.0827827	1	0.75737	0.319305	7.40652	-0.371306	-7.77782	4.78294	4.56288	4.78326	0.121495	0.935143	0.103939	0.671804	1	0.486883	NA
s__Lactococcus_phage_1706	NA	NA	NA	NA	NA	NA	NA	NA	NA	NA	NA	NA	-6.49468	0	8.0842	4.70173	4.91378	4.70173	0.167175	1	0.0855399	0.620937	1	0.363625	NA	NA	NA	NA	NA	NA	NA	NA	NA	NA	NA	NA	NA	NA	NA	NA	NA	NA	NA	NA	NA	NA	NA	NA	NA
s__Lactococcus_phage_340	NA	NA	NA	NA	NA	NA	NA	NA	NA	NA	NA	NA	0	-3.32008	-3.97109	4.99745	4.80452	4.8044	1	0.489544	0.408491	1	0.702721	0.699121	NA	NA	NA	NA	NA	NA	NA	NA	NA	NA	NA	NA	NA	NA	NA	NA	NA	NA	NA	NA	NA	NA	NA	NA	NA
s__Lactococcus_phage_949	NA	NA	NA	NA	NA	NA	NA	NA	NA	NA	NA	NA	10.7081	11.6467	0	3.87567	3.87574	4.13475	0.00572892	0.00265566	1	0.148952	0.0138094	1	NA	NA	NA	NA	NA	NA	NA	NA	NA	NA	NA	NA	0	-7.19352	-6.46836	4.99746	4.79088	4.79076	1	0.133226	0.176961	1	0.738381	0.486883	NA
s__Lactococcus_phage_bIL285	-5.36293	-6.37773	-1.01479	5.75118	5.74911	4.40145	0.351082	0.267283	0.817658	0.864201	0.801961	0.922464	7.94562	8.88414	0	3.99363	3.9937	4.24149	0.0466377	0.0261121	1	0.303145	0.0848642	1	-5.71209	0	5.15171	4.80591	4.99758	4.80591	0.234615	1	0.283741	1	1	0.432981	4.22364	4.44881	0	4.80398	4.8041	4.99746	0.379294	0.354423	1	0.790197	0.738381	1	-7.2386
s__Lactococcus_phage_bIL286	NA	NA	NA	NA	NA	NA	NA	NA	NA	NA	NA	NA	NA	NA	NA	NA	NA	NA	NA	NA	NA	NA	NA	NA	4.04734	4.36673	0	4.80581	4.80593	4.99745	0.39969	0.363555	1	1	0.545332	1	4.60986	4.83503	0	4.79946	4.79958	4.99746	0.336805	0.313749	1	0.790197	0.738381	1	NA
s__Lactococcus_phage_bIL309	2.534	7.26954	4.73554	5.53962	5.71154	4.7474	0.647361	0.203096	0.31852	0.895743	0.801961	0.70922	0	-4.68801	-5.33899	4.99745	4.79246	4.79234	1	0.327974	0.265251	1	0.655947	0.689652	0	-6.35952	-5.47974	4.99745	4.79561	4.79549	1	0.184803	0.253169	1	0.44244	0.432981	NA	NA	NA	NA	NA	NA	NA	NA	NA	NA	NA	NA	-8.01753
s__Lactococcus_phage_bIL310	1.62421	7.64396	6.01975	4.82603	5.03107	4.19393	0.736455	0.128674	0.151188	0.931078	0.801961	0.599835	-5.68072	-5.83135	-0.150628	3.91359	3.90819	3.64253	0.14663	0.135676	0.967015	0.620937	0.352759	1	0	-6.19371	-5.31393	4.99745	4.79693	4.79681	1	0.19664	0.267945	1	0.44244	0.432981	1.66067	6.50068	4.84001	4.48354	4.68531	4.70519	0.71109	0.165302	0.303642	0.85948	0.738381	0.690096	-6.80828
s__Lactococcus_phage_BK5_T	-5.60199	-6.26144	-0.659452	5.14975	5.14928	3.87333	0.276675	0.223991	0.86481	0.826252	0.801961	0.922464	7.34213	1.66321	-5.67892	3.43154	3.12286	3.43111	0.0323868	0.594316	0.0978991	0.280685	0.737868	0.363625	0	-5.9717	-5.09192	4.99745	4.79893	4.79881	1	0.21336	0.288654	1	0.443132	0.432981	-6.71617	0	6.2162	4.79406	4.99758	4.79406	0.161233	1	0.194753	0.671804	1	0.486883	NA
s__Lactococcus_phage_P335_sensu_lato	-3.82391	-5.376	-1.55209	5.97038	5.95939	4.60544	0.52186	0.367	0.736108	0.866768	0.978668	0.872424	0	-3.64159	-4.29259	4.99745	4.80059	4.80047	1	0.448109	0.371214	1	0.702721	0.699121	NA	NA	NA	NA	NA	NA	NA	NA	NA	NA	NA	NA	NA	NA	NA	NA	NA	NA	NA	NA	NA	NA	NA	NA	NA
s__Lactococcus_phage_phiLC3	NA	NA	NA	NA	NA	NA	NA	NA	NA	NA	NA	NA	-5.74228	0	7.3318	4.79087	4.9962	4.79087	0.230688	1	0.125925	0.660769	1	0.409257	NA	NA	NA	NA	NA	NA	NA	NA	NA	NA	NA	NA	NA	NA	NA	NA	NA	NA	NA	NA	NA	NA	NA	NA	NA
s__Lactococcus_phage_ul36	-7.31445	0	7.38658	4.9744	5.17716	3.97628	0.141448	1	0.0632167	0.64662	1	0.404587	8.7443	9.68283	0	3.95285	3.95292	4.20514	0.0269561	0.0143039	1	0.280685	0.0619835	1	-7.05241	0	6.49203	4.7931	4.99758	4.7931	0.141192	1	0.175592	1	1	0.357106	-7.05984	0	6.55986	4.79208	4.99758	4.79208	0.140689	1	0.171032	0.671804	1	0.486883	-5.86754
s__Lactococcus_virus_bIL67	NA	NA	NA	NA	NA	NA	NA	NA	NA	NA	NA	NA	4.74336	1.17749	-3.56588	4.38665	4.17281	4.37344	0.279556	0.777805	0.414873	0.660769	0.879257	0.699121	NA	NA	NA	NA	NA	NA	NA	NA	NA	NA	NA	NA	NA	NA	NA	NA	NA	NA	NA	NA	NA	NA	NA	NA	NA
s__Phage_Gifsy_1	-8.50021	0	8.57235	4.81968	5.02999	3.84657	0.0777914	1	0.0258425	0.622331	1	0.275654	NA	NA	NA	NA	NA	NA	NA	NA	NA	NA	NA	NA	NA	NA	NA	NA	NA	NA	NA	NA	NA	NA	NA	NA	NA	NA	NA	NA	NA	NA	NA	NA	NA	NA	NA	NA	NA
s__Platyrrhini_mastadenovirus_A	0	-3.66726	-4.26876	6.12056	5.98451	4.8297	1	0.540014	0.376773	1	1	0.70922	0	-3.14076	-3.79177	4.99745	4.80712	4.807	1	0.513527	0.430228	1	0.702721	0.699121	2.56351	2.88288	0	4.8432	4.84332	4.99745	0.596597	0.551691	1	1	0.70049	1	2.9069	3.13205	0	4.83256	4.83268	4.99746	0.547491	0.516922	1	0.85948	0.99408	1	NA
s__Porcine_associated_porprismacovirus_2	NA	NA	NA	NA	NA	NA	NA	NA	NA	NA	NA	NA	NA	NA	NA	NA	NA	NA	NA	NA	NA	NA	NA	NA	0	-3.84519	-2.96544	4.99745	4.84605	4.84593	1	0.427505	0.540575	1	0.607507	0.663432	-4.63725	0	4.13727	4.82403	4.99758	4.82403	0.336411	1	0.391092	0.790197	1	0.814776	NA
s__Porcine_associated_porprismacovirus_3	NA	NA	NA	NA	NA	NA	NA	NA	NA	NA	NA	NA	NA	NA	NA	NA	NA	NA	NA	NA	NA	NA	NA	NA	0	-5.07571	-4.19595	4.99745	4.81104	4.81092	1	0.291419	0.383115	1	0.510449	0.517205	-3.30792	0	2.80794	4.88284	4.99758	4.88284	0.498115	1	0.565248	0.85948	1	1	-2.84616
s__Salmonella_phage_Fels_1	-6.51935	0	6.59149	5.95158	6.12071	4.789	0.273342	1	0.168704	0.826252	1	0.599835	NA	NA	NA	NA	NA	NA	NA	NA	NA	NA	NA	NA	0	-7.22744	-6.34764	4.99745	4.79074	4.79062	1	0.131394	0.185166	1	0.354765	0.357106	NA	NA	NA	NA	NA	NA	NA	NA	NA	NA	NA	NA	NA
s__Salmonella_phage_RE_2010	-1.47022	-0.7878	0.682424	2.3066	2.30757	1.88083	0.523866	0.732804	0.716731	0.866768	1	0.872424	NA	NA	NA	NA	NA	NA	NA	NA	NA	NA	NA	NA	NA	NA	NA	NA	NA	NA	NA	NA	NA	NA	NA	NA	NA	NA	NA	NA	NA	NA	NA	NA	NA	NA	NA	NA	NA
s__Salmonella_phage_SSU5	NA	NA	NA	NA	NA	NA	NA	NA	NA	NA	NA	NA	NA	NA	NA	NA	NA	NA	NA	NA	NA	NA	NA	NA	NA	NA	NA	NA	NA	NA	NA	NA	NA	NA	NA	NA	NA	NA	NA	NA	NA	NA	NA	NA	NA	NA	NA	NA	0
s__Salmonella_phage_Vi_II_E1	NA	NA	NA	NA	NA	NA	NA	NA	NA	NA	NA	NA	NA	NA	NA	NA	NA	NA	NA	NA	NA	NA	NA	NA	0	-8.25124	-7.37144	4.99745	4.78773	4.78761	1	0.0848138	0.123636	1	0.295364	0.343644	NA	NA	NA	NA	NA	NA	NA	NA	NA	NA	NA	NA	NA
s__Salmonella_virus_Jersey	NA	NA	NA	NA	NA	NA	NA	NA	NA	NA	NA	NA	NA	NA	NA	NA	NA	NA	NA	NA	NA	NA	NA	NA	0	-8.18082	-7.30102	4.99745	4.78788	4.78776	1	0.0875154	0.127276	1	0.295364	0.343644	NA	NA	NA	NA	NA	NA	NA	NA	NA	NA	NA	NA	NA
s__Salmonella_virus_PsP3	-8.97483	-7.69966	1.27517	3.94234	3.94478	2.7596	0.0228149	0.050955	0.644021	0.365038	0.495237	0.872424	NA	NA	NA	NA	NA	NA	NA	NA	NA	NA	NA	NA	NA	NA	NA	NA	NA	NA	NA	NA	NA	NA	NA	NA	NA	NA	NA	NA	NA	NA	NA	NA	NA	NA	NA	NA	NA
s__Shigella_phage_SfIV	-1.80728	-0.8293	0.977975	2.26839	2.26962	1.8491	0.425613	0.714819	0.596881	0.866768	1	0.872424	NA	NA	NA	NA	NA	NA	NA	NA	NA	NA	NA	NA	NA	NA	NA	NA	NA	NA	NA	NA	NA	NA	NA	NA	NA	NA	NA	NA	NA	NA	NA	NA	NA	NA	NA	NA	NA
s__Shigella_virus_Sf6	NA	NA	NA	NA	NA	NA	NA	NA	NA	NA	NA	NA	NA	NA	NA	NA	NA	NA	NA	NA	NA	NA	NA	NA	0	-8.27398	-7.39417	4.99745	4.78769	4.78757	1	0.0839564	0.122479	1	0.295364	0.343644	NA	NA	NA	NA	NA	NA	NA	NA	NA	NA	NA	NA	NA
s__Simian_mastadenovirus_F	-4.4775	0	4.54962	5.96229	6.12071	4.80231	0.452671	1	0.343445	0.866768	1	0.70922	0.750361	7.15891	6.40855	4.27193	4.49374	4.49427	0.86057	0.111141	0.153887	1	0.321074	0.444561	4.62886	4.94826	0	4.79883	4.79895	4.99745	0.334755	0.302488	1	1	0.510449	1	4.37154	4.59671	0	4.80211	4.80223	4.99746	0.362644	0.338464	1	0.790197	0.738381	1	NA
s__Streptococcus_phage_MM1	0	-4.25621	-4.85771	6.12056	5.9724	4.81468	1	0.476065	0.313005	1	1	0.70922	5.34061	6.27913	0	4.81	4.81012	4.99745	0.266864	0.191757	1	0.660769	0.415473	1	NA	NA	NA	NA	NA	NA	NA	NA	NA	NA	NA	NA	NA	NA	NA	NA	NA	NA	NA	NA	NA	NA	NA	NA	NA
s__Streptococcus_phage_phiNJ2	1.55602	0.0294267	-1.5266	2.73085	2.72688	2.2313	0.568816	0.99139	0.493866	0.866768	1	0.831774	0.826302	1.25426	0.42796	4.06094	4.05959	4.05989	0.838763	0.75735	0.916049	1	0.879257	1	-7.32995	0	6.76957	4.79164	4.99758	4.79164	0.126082	1	0.157718	1	1	0.357106	-1.7467	-1.86696	-0.120257	4.26652	4.26497	4.25492	0.682248	0.661573	0.977452	0.85948	1	1	-6.64972
s__Streptococcus_virus_7201	1.78011	-1.09642	-2.87653	2.97271	2.96925	2.42693	0.549293	0.711935	0.235917	0.866768	1	0.686304	1.60573	15.6702	14.0645	3.08069	3.40169	3.4017	0.602211	4.09298e-06	3.56e-05	1	5.32088e-05	0.000462352	-2.41874	8.57729	10.996	4.02726	4.27751	4.27657	0.548112	0.0449409	0.0101339	1	0.295364	0.0684041	-1.37106	10.071	11.442	4.06057	4.30903	4.3088	0.735625	0.0194298	0.00791896	0.85948	0.242873	0.098987	-7.74597
s__Streptococcus_virus_DT1	1.06718	24.6286	23.5615	3.44163	3.73132	3.15843	0.756501	4.09746e-11	8.66059e-14	0.931078	1.31119e-09	2.77139e-12	1.6387	17.6573	16.0186	3.07524	3.39683	3.39681	0.594124	2.01266e-07	2.41e-06	1	5.23292e-06	6.26075e-05	-26.2031	0	25.5528	4.78488	4.99758	4.78488	4.34465e-08	1	9.27816e-08	1.17305e-06	1	2.5051e-06	-1.36131	25.2807	26.642	4.56224	4.78493	4.78479	0.765409	1.26801e-07	2.57579e-08	0.85948	3.17003e-06	6.43947e-07	-9.24967
s__Streptococcus_virus_phiAbc2	0.995438	-0.645456	-1.64089	2.22455	2.2241	1.81613	0.65453	0.771656	0.366254	0.895743	1	0.70922	1.5888	11.2325	9.64373	3.03081	3.05339	3.05339	0.600128	0.000234417	0.00158654	1	0.00152371	0.0103125	-2.06302	10.0713	12.1343	2.17393	2.60878	2.60833	0.34263	0.000113142	3.28526e-06	1	0.00305483	4.4351e-05	-1.43036	3.60851	5.03887	3.48126	3.48462	3.48451	0.681165	0.30041	0.148155	0.85948	0.738381	0.486883	-4.8268
s__Streptococcus_virus_Sfi21	1.08409	0.180046	-0.904042	2.55881	2.55793	2.09011	0.671808	0.943886	0.665354	0.895743	1	0.872424	1.24883	12.7902	11.5414	3.04448	3.36845	3.3686	0.681663	0.000146423	0.00061219	1	0.001269	0.00530564	-1.4437	7.59189	9.03559	3.76262	4.02806	4.02701	0.701204	0.0594631	0.0248488	1	0.295364	0.134184	-1.08794	4.58861	5.67654	3.773	3.82247	3.8221	0.773081	0.229972	0.137493	0.85948	0.738381	0.486883	NA
s__Stx2_converting_phage_1717	0	-8.7348	-9.3363	4.89456	4.67858	3.72867	1	0.0619046	0.0122825	1	0.495237	0.19652	NA	NA	NA	NA	NA	NA	NA	NA	NA	NA	NA	NA	NA	NA	NA	NA	NA	NA	NA	NA	NA	NA	NA	NA	NA	NA	NA	NA	NA	NA	NA	NA	NA	NA	NA	NA	NA
s__Turkey_aviadenovirus_B	NA	NA	NA	NA	NA	NA	NA	NA	NA	NA	NA	NA	-0.252632	2.1406	2.39323	4.02819	4.03731	4.03185	0.949993	0.59597	0.552792	1	0.737868	0.845447	NA	NA	NA	NA	NA	NA	NA	NA	NA	NA	NA	NA	NA	NA	NA	NA	NA	NA	NA	NA	NA	NA	NA	NA	NA
[truncated: 11 more columns]
